# Supplementary material
Source: MDPI journal article supplement (https://www.mdpi.com/2073-4344/12/7/789)
Supplement: s1 [file s1]

# Mechanistic Details of the Sharpless Epoxidation of Allylic Alcohols—A combined URVA and Local Mode Study

## 1. Movies from IRC calculations

**Table S1.** Movie files of the investigate reactions.

| Reaction | File Name  |
|----------|------------|
| R0       | R0-mov.mpg |
| R1       | R1-mov.mpg |
| R2       | R2-mov.mpg |
| R3       | R3-mov.mpg |
| R4       | R4-mov.mpg |

**Table S2.** Cartesian coordinates from end-points of IRC Reactant - R0.

|                     |          |          |          |
|---------------------|----------|----------|----------|
| O                   | -0.89795 | -0.18016 | -0.90955 |
| H                   | 2.73199  | 1.13512  | -1.24249 |
| C                   | 2.07832  | 1.53890  | -0.46371 |
| H                   | 2.56168  | 2.42261  | -0.03064 |
| C                   | 1.77905  | 0.51687  | 0.59392  |
| H                   | 1.14806  | 1.87755  | -0.93446 |
| C                   | 2.18497  | -0.75682 | 0.57807  |
| H                   | 1.16406  | 0.85931  | 1.42656  |
| H                   | 2.80223  | -1.14778 | -0.22768 |
| H                   | 1.93158  | -1.44636 | 1.37794  |
| O                   | -1.77268 | 0.00192  | 0.23973  |
| H                   | -2.31244 | -2.01776 | 0.24948  |
| H                   | -0.07140 | -0.43469 | -0.45545 |
| C                   | -2.75268 | -1.01647 | 0.15326  |
| H                   | -3.31406 | -0.95422 | -0.78634 |
| H                   | -3.42642 | -0.82846 | 0.99555  |
| <b>TS - R0</b>      |          |          |          |
| O                   | 0.07586  | -0.41914 | -0.00965 |
| H                   | -1.48327 | 1.44542  | 1.18038  |
| C                   | -1.59663 | 1.39811  | 0.09377  |
| H                   | -2.58559 | 1.78533  | -0.17031 |
| C                   | -1.45034 | -0.02217 | -0.39383 |
| H                   | -0.83490 | 2.03308  | -0.36485 |
| C                   | -1.98003 | -1.09937 | 0.35170  |
| H                   | -1.50229 | -0.11554 | -1.47964 |
| H                   | -2.12376 | -1.00326 | 1.42154  |
| H                   | -2.11248 | -2.07945 | -0.09237 |
| O                   | 1.91001  | -0.08986 | -0.66992 |
| H                   | 2.65924  | -0.70587 | 1.18647  |
| H                   | 0.35145  | -1.14137 | -0.59730 |
| C                   | 2.64575  | 0.14008  | 0.47416  |
| H                   | 2.33481  | 1.04440  | 1.02915  |
| H                   | 3.69738  | 0.30938  | 0.16864  |
| <b>Product - R0</b> |          |          |          |
| O                   | 0.77619  | -0.66694 | -0.36371 |
| H                   | 3.01680  | 0.72660  | -0.87509 |

|                      |          |          |          |
|----------------------|----------|----------|----------|
| C                    | 2.15298  | 1.38818  | -0.76628 |
| H                    | 2.47190  | 2.29871  | -0.24745 |
| C                    | 1.05041  | 0.70819  | 0.00020  |
| H                    | 1.81039  | 1.67317  | -1.76625 |
| C                    | 1.30563  | -0.38257 | 0.94967  |
| H                    | 0.13852  | 1.28420  | 0.15766  |
| H                    | 2.32599  | -0.72828 | 1.10952  |
| H                    | 0.61052  | -0.55575 | 1.76882  |
| O                    | -1.86220 | -0.42045 | 0.53642  |
| H                    | -3.25269 | -1.50145 | -0.60985 |
| H                    | -1.09122 | -0.73801 | 0.03327  |
| C                    | -3.00140 | -0.47545 | -0.29905 |
| H                    | -2.89671 | 0.13693  | -1.20858 |
| H                    | -3.84862 | -0.08320 | 0.27157  |
| <b>Reactant - R1</b> |          |          |          |
| Ti                   | -0.18094 | 1.19313  | -0.34195 |
| Ti                   | 0.84864  | -1.97070 | 0.00244  |
| H                    | -2.29469 | -1.65488 | 0.78534  |
| H                    | 2.87631  | 1.32133  | 0.38237  |
| C                    | -2.13049 | -1.12770 | -0.16210 |
| C                    | 2.75861  | 0.28873  | 0.02414  |
| C                    | -2.70825 | -2.03463 | -1.25294 |
| C                    | 3.70166  | 0.01544  | -1.16832 |
| O                    | -0.76076 | -0.82244 | -0.29507 |
| O                    | 1.44282  | 0.03200  | -0.36860 |
| C                    | -2.91719 | 0.24296  | -0.16517 |
| C                    | 3.01558  | -0.75783 | 1.16060  |
| C                    | -3.84614 | 0.32414  | 1.06803  |
| C                    | 2.02549  | -0.45172 | 2.30172  |
| H                    | -3.55519 | 0.28524  | -1.05918 |
| H                    | 4.06232  | -0.75615 | 1.49978  |
| O                    | -2.00618 | 1.29311  | -0.19724 |
| O                    | 2.62914  | -1.98248 | 0.63844  |
| O                    | -3.66698 | 1.10959  | 1.98754  |
| O                    | 0.88540  | -0.92618 | 2.19745  |
| N                    | -4.86356 | -0.57617 | 1.00705  |
| N                    | 2.40520  | 0.32511  | 3.33070  |
| O                    | 0.27321  | 2.44355  | -1.67145 |
| O                    | -0.00392 | -3.34699 | 0.80949  |
| H                    | -0.09780 | -3.46924 | 1.76197  |
| O                    | -3.91386 | -2.30364 | -1.21229 |
| O                    | 3.40151  | -0.73241 | -2.08875 |
| N                    | -1.88112 | -2.45453 | -2.23265 |
| N                    | 4.92038  | 0.62369  | -1.08337 |
| O                    | -0.18992 | 1.32147  | -2.49422 |
| O                    | 1.09260  | -2.53550 | -1.70016 |
| H                    | 1.83823  | -2.05273 | -2.11543 |
| C                    | -1.33579 | 1.75263  | -3.24643 |
| H                    | -1.01903 | 2.50569  | -3.97155 |
| H                    | -2.10496 | 2.14592  | -2.57860 |
| H                    | -1.68580 | 0.85144  | -3.75677 |
| O                    | 0.38811  | 2.23083  | 1.00601  |
| C                    | 0.73857  | 3.53241  | 1.41068  |
| H                    | 1.61558  | 3.46207  | 2.07653  |
| C                    | -0.36125 | 4.27780  | 2.11966  |
| H                    | 1.06223  | 4.11043  | 0.52951  |
| C                    | -1.59771 | 3.83165  | 2.33822  |

|                |          |          |          |
|----------------|----------|----------|----------|
| H              | -0.06339 | 5.27217  | 2.45726  |
| H              | -1.94396 | 2.85514  | 2.01353  |
| H              | -2.31885 | 4.45721  | 2.85720  |
| H              | -4.86132 | -1.29367 | 0.28345  |
| H              | -5.45853 | -0.67176 | 1.81611  |
| H              | -0.86941 | -2.35566 | -2.18051 |
| H              | -2.26230 | -3.12185 | -2.88862 |
| H              | 5.07306  | 1.40885  | -0.46992 |
| H              | 5.54630  | 0.51415  | -1.86882 |
| H              | 3.34681  | 0.67198  | 3.41802  |
| H              | 1.71840  | 0.58980  | 4.02339  |
| <b>TS - R1</b> |          |          |          |
| Ti             | -0.18327 | 1.16071  | -0.34025 |
| Ti             | 0.68082  | -2.04276 | 0.16432  |
| H              | -2.36282 | -1.48788 | 1.10080  |
| H              | 2.93130  | 1.10565  | 0.37566  |
| C              | -2.23751 | -1.03403 | 0.11059  |
| C              | 2.72855  | 0.07223  | 0.05917  |
| C              | -2.92673 | -1.97971 | -0.87720 |
| C              | 3.62493  | -0.31045 | -1.14108 |
| O              | -0.86687 | -0.81124 | -0.13133 |
| O              | 1.39191  | -0.10689 | -0.29404 |
| C              | -2.95034 | 0.37318  | 0.06251  |
| C              | 2.94938  | -0.94507 | 1.22844  |
| C              | -3.81920 | 0.59960  | 1.32222  |
| C              | 2.01332  | -0.53843 | 2.38350  |
| H              | -3.62516 | 0.40104  | -0.80505 |
| H              | 4.00316  | -0.99890 | 1.54163  |
| O              | -1.98197 | 1.36053  | -0.07748 |
| O              | 2.47296  | -2.15920 | 0.75929  |
| O              | -3.59274 | 1.48118  | 2.13717  |
| O              | 0.84464  | -0.94391 | 2.32970  |
| N              | -4.85064 | -0.28394 | 1.40205  |
| N              | 2.47472  | 0.24135  | 3.37727  |
| O              | 0.08238  | 2.74896  | -1.43466 |
| O              | -0.23561 | -3.32653 | 1.05471  |
| H              | -0.29839 | -3.39208 | 2.01538  |
| O              | -4.13659 | -2.19233 | -0.74074 |
| O              | 3.25273  | -1.06323 | -2.03005 |
| N              | -2.18634 | -2.49609 | -1.88048 |
| N              | 4.88787  | 0.20728  | -1.09998 |
| O              | -0.06579 | 1.18488  | -2.31078 |
| O              | 0.82740  | -2.69576 | -1.51834 |
| H              | 1.58351  | -2.27612 | -1.97963 |
| C              | -1.14453 | 1.31735  | -3.22204 |
| H              | -0.83262 | 1.93147  | -4.07252 |
| H              | -2.02142 | 1.76365  | -2.74291 |
| H              | -1.39672 | 0.30958  | -3.57565 |
| O              | 0.52425  | 2.13068  | 1.06589  |
| C              | 1.17550  | 3.37207  | 1.07264  |
| H              | 1.02477  | 3.84931  | 2.05500  |
| C              | 0.67090  | 4.28555  | -0.01821 |
| H              | 2.26435  | 3.24421  | 0.95208  |
| C              | -0.64451 | 4.36660  | -0.35761 |

|                     |          |          |          |
|---------------------|----------|----------|----------|
| H                   | 1.39973  | 4.89805  | -0.54337 |
| H                   | -1.41359 | 3.83085  | 0.18948  |
| H                   | -0.97033 | 5.03509  | -1.14642 |
| H                   | -4.91536 | -1.05636 | 0.74046  |
| H                   | -5.42974 | -0.26440 | 2.22747  |
| H                   | -1.17053 | -2.44220 | -1.89853 |
| H                   | -2.63780 | -3.18606 | -2.46430 |
| H                   | 5.11917  | 0.98717  | -0.50515 |
| H                   | 5.49075  | 0.02129  | -1.88882 |
| H                   | 3.43569  | 0.53982  | 3.41824  |
| H                   | 1.82464  | 0.58100  | 4.07223  |
| <b>Product - R1</b> |          |          |          |
| Ti                  | -0.14939 | 1.06874  | -0.41259 |
| Ti                  | 0.86534  | -2.09863 | -0.03491 |
| H                   | -2.22004 | -1.74375 | 0.80727  |
| H                   | 2.90849  | 1.15300  | 0.44094  |
| C                   | -2.10218 | -1.23159 | -0.15486 |
| C                   | 2.79097  | 0.12678  | 0.06416  |
| C                   | -2.72096 | -2.15732 | -1.20510 |
| C                   | 3.74594  | -0.13238 | -1.12196 |
| O                   | -0.73644 | -0.93060 | -0.35714 |
| O                   | 1.47792  | -0.11507 | -0.34226 |
| C                   | -2.88209 | 0.13964  | -0.14264 |
| C                   | 3.02947  | -0.94005 | 1.18511  |
| C                   | -3.79022 | 0.24637  | 1.10440  |
| C                   | 2.04047  | -0.63775 | 2.32813  |
| H                   | -3.52974 | 0.19302  | -1.02877 |
| H                   | 4.07472  | -0.95875 | 1.52868  |
| O                   | -1.95691 | 1.17553  | -0.18004 |
| O                   | 2.62987  | -2.15073 | 0.64027  |
| O                   | -3.61662 | 1.08407  | 1.97956  |
| O                   | 0.88777  | -1.07486 | 2.21022  |
| N                   | -4.78122 | -0.68216 | 1.10742  |
| N                   | 2.44228  | 0.09955  | 3.37919  |
| O                   | -1.23469 | 4.33741  | -0.16845 |
| O                   | -0.02442 | -3.45391 | 0.77114  |
| H                   | -0.11887 | -3.56498 | 1.72501  |
| O                   | -3.92451 | -2.42458 | -1.11540 |
| O                   | 3.44933  | -0.85719 | -2.06162 |
| N                   | -1.92696 | -2.60163 | -2.19933 |
| N                   | 4.96976  | 0.46169  | -1.01004 |
| O                   | 0.08327  | 1.78424  | -2.02409 |
| O                   | 1.11428  | -2.66810 | -1.73332 |
| H                   | 1.86800  | -2.19618 | -2.14467 |
| C                   | -0.67647 | 2.50222  | -2.97878 |
| H                   | -0.16740 | 3.44306  | -3.21426 |
| H                   | -1.67292 | 2.72897  | -2.58582 |
| H                   | -0.76382 | 1.90574  | -3.89436 |
| O                   | 0.48773  | 2.20607  | 0.85755  |
| C                   | 0.79820  | 3.55499  | 1.07210  |
| H                   | 1.23696  | 3.66928  | 2.07591  |
| C                   | -0.39061 | 4.49174  | 0.96960  |
| H                   | 1.55597  | 3.88849  | 0.34324  |
| C                   | -1.78794 | 4.07329  | 1.14475  |
| H                   | -0.12498 | 5.52867  | 1.19940  |
| H                   | -2.04614 | 3.03436  | 1.33258  |
| H                   | -2.51290 | 4.81455  | 1.48051  |

|                      |          |          |          |
|----------------------|----------|----------|----------|
| H                    | -4.79802 | -1.41201 | 0.39587  |
| H                    | -5.38272 | -0.73600 | 1.91518  |
| H                    | -0.91808 | -2.48011 | -2.19462 |
| H                    | -2.32911 | -3.26905 | -2.84191 |
| H                    | 5.12885  | 1.22323  | -0.36930 |
| H                    | 5.60812  | 0.35812  | -1.78608 |
| H                    | 3.39632  | 0.40564  | 3.48221  |
| H                    | 1.76770  | 0.34886  | 4.08895  |
| <b>Reactant - R2</b> |          |          |          |
| Ti                   | 0.29535  | 0.97325  | 0.70677  |
| Ti                   | -0.91487 | -1.82482 | -0.64310 |
| H                    | 2.20573  | -1.26766 | -1.49853 |
| H                    | -2.80243 | 1.43065  | 0.29420  |
| C                    | 2.12159  | -1.15428 | -0.41107 |
| C                    | -2.71061 | 0.33505  | 0.27450  |
| C                    | 2.72205  | -2.42886 | 0.18882  |
| C                    | -3.55795 | -0.30544 | 1.39601  |
| O                    | 0.77694  | -0.89423 | -0.07361 |
| O                    | -1.38089 | -0.06971 | 0.42388  |
| C                    | 2.97569  | 0.08524  | 0.07469  |
| C                    | -3.11694 | -0.26165 | -1.11438 |
| C                    | 3.81358  | 0.64128  | -1.09921 |
| C                    | -2.22918 | 0.40335  | -2.18547 |
| H                    | 3.67832  | -0.24641 | 0.85098  |
| H                    | -4.18974 | -0.13630 | -1.32350 |
| O                    | 2.12073  | 1.04420  | 0.60616  |
| O                    | -2.73732 | -1.59463 | -1.07869 |
| O                    | 3.59941  | 1.72799  | -1.62004 |
| O                    | -1.10826 | -0.08775 | -2.37567 |
| N                    | 4.79430  | -0.21813 | -1.48069 |
| N                    | -2.68427 | 1.48020  | -2.84998 |
| O                    | -0.10692 | 1.71668  | 2.38139  |
| O                    | -0.17506 | -2.82060 | -1.96068 |
| H                    | -0.16977 | -2.58160 | -2.89562 |
| O                    | 3.90829  | -2.67974 | -0.05285 |
| O                    | -3.23932 | -1.35035 | 1.94664  |
| N                    | 1.94263  | -3.18546 | 0.98615  |
| N                    | -4.72248 | 0.34929  | 1.67569  |
| O                    | 0.30348  | 0.39389  | 2.86799  |
| O                    | -1.05735 | -2.96521 | 0.75456  |
| H                    | -1.74999 | -2.65267 | 1.37420  |
| C                    | 1.44977  | 0.57271  | 3.70928  |
| H                    | 2.25890  | 1.06011  | 3.16003  |
| H                    | 1.73712  | -0.44101 | 4.00215  |
| H                    | 1.16607  | 1.15611  | 4.58890  |
| O                    | -0.12457 | 2.33247  | -0.38193 |
| C                    | 0.58469  | 3.30717  | -1.12756 |
| H                    | 1.65371  | 3.04847  | -1.13354 |
| C                    | 0.37923  | 4.70415  | -0.61240 |
| H                    | 0.24109  | 3.25022  | -2.17295 |
| C                    | -0.32328 | 5.04534  | 0.46751  |
| H                    | 0.88072  | 5.47103  | -1.20391 |
| H                    | -0.81649 | 4.29708  | 1.08019  |
| H                    | -0.40889 | 6.08167  | 0.77951  |
| H                    | -4.85048 | 1.31588  | 1.41875  |
| H                    | -5.27390 | -0.00479 | 2.44489  |
| H                    | -3.59897 | 1.86509  | -2.67672 |

---

|                |          |          |          |
|----------------|----------|----------|----------|
| H              | -2.06419 | 1.96496  | -3.48318 |
| H              | 0.93898  | -3.04363 | 1.07648  |
| H              | 2.33436  | -4.06006 | 1.30585  |
| H              | 4.81212  | -1.16328 | -1.09955 |
| H              | 5.32545  | 0.00585  | -2.30866 |
| <b>TS - R2</b> |          |          |          |
| Ti             | -0.17232 | 1.12375  | -0.42410 |
| Ti             | 0.70636  | -2.04925 | 0.17185  |
| H              | -2.35912 | -1.43659 | 1.06886  |
| H              | 2.90024  | 1.14821  | 0.46739  |
| C              | -2.22277 | -1.05211 | 0.05117  |
| C              | 2.72875  | 0.11401  | 0.13300  |
| C              | -2.90071 | -2.06329 | -0.87535 |
| C              | 3.66442  | -0.24259 | -1.04450 |
| O              | -0.85028 | -0.84194 | -0.18950 |
| O              | 1.40511  | -0.08473 | -0.25916 |
| C              | -2.94481 | 0.34569  | -0.10213 |
| C              | 2.92737  | -0.91365 | 1.29752  |
| C              | -3.79481 | 0.66286  | 1.14965  |
| C              | 1.94402  | -0.53730 | 2.42389  |
| H              | -3.63381 | 0.29893  | -0.95719 |
| H              | 3.97029  | -0.95100 | 1.64691  |
| O              | -1.98912 | 1.32487  | -0.33617 |
| O              | 2.49013  | -2.13093 | 0.80022  |
| O              | -3.55871 | 1.60229  | 1.89745  |
| O              | 0.79235  | -0.98368 | 2.33513  |
| N              | -4.82125 | -0.21368 | 1.30953  |
| N              | 2.34932  | 0.25197  | 3.43396  |
| O              | 0.28373  | 2.75067  | -1.38085 |
| O              | -0.20950 | -3.35436 | 1.02889  |
| H              | -0.28665 | -3.42499 | 1.98826  |
| O              | -4.10549 | -2.28791 | -0.71352 |
| O              | 3.32889  | -0.99404 | -1.94853 |
| N              | -2.15734 | -2.61724 | -1.85436 |
| N              | 4.91669  | 0.29596  | -0.96301 |
| O              | -0.01014 | 1.26294  | -2.39951 |
| O              | 0.91251  | -2.69473 | -1.50532 |
| H              | 1.67061  | -2.26615 | -1.95351 |
| C              | -1.02184 | 1.60492  | -3.32723 |
| H              | -1.90787 | 2.00582  | -2.82449 |
| H              | -1.29267 | 0.68481  | -3.86253 |
| H              | -0.63851 | 2.33439  | -4.04814 |
| O              | 0.25704  | 2.00899  | 1.15079  |
| C              | -0.36166 | 3.25966  | 1.38679  |
| H              | -1.44909 | 3.12766  | 1.46287  |
| C              | -0.02562 | 4.21741  | 0.26838  |
| H              | -0.00399 | 3.66604  | 2.34750  |
| C              | 1.19024  | 4.22141  | -0.34840 |
| H              | -0.80637 | 4.88771  | -0.08305 |
| H              | 2.01333  | 3.63540  | 0.04309  |
| H              | 1.41160  | 4.91399  | -1.15139 |
| H              | 5.11791  | 1.07450  | -0.35560 |
| H              | 5.54493  | 0.12647  | -1.73561 |
| H              | 3.28438  | 0.62424  | 3.47350  |
| H              | 1.65841  | 0.59921  | 4.08433  |
| H              | -1.14680 | -2.51878 | -1.89792 |
| H              | -2.59494 | -3.33901 | -2.40895 |

---

|                     |          |          |          |
|---------------------|----------|----------|----------|
| H                   | -4.89159 | -1.03215 | 0.70626  |
| H                   | -5.38889 | -0.13860 | 2.13979  |
| <b>Product - R2</b> |          |          |          |
| Ti                  | 0.28450  | 0.77341  | 0.79472  |
| Ti                  | -0.92651 | -1.97349 | -0.65638 |
| H                   | 2.10581  | -1.43849 | -1.53706 |
| H                   | -2.79314 | 1.31238  | 0.19814  |
| C                   | 2.08879  | -1.30192 | -0.44953 |
| C                   | -2.72211 | 0.21515  | 0.17457  |
| C                   | 2.74218  | -2.55373 | 0.13856  |
| C                   | -3.63748 | -0.41758 | 1.24596  |
| O                   | 0.75940  | -1.07064 | -0.03236 |
| O                   | -1.40918 | -0.21197 | 0.38426  |
| C                   | 2.93444  | -0.03127 | -0.04584 |
| C                   | -3.07144 | -0.36535 | -1.23682 |
| C                   | 3.67870  | 0.52085  | -1.28127 |
| C                   | -2.12059 | 0.29165  | -2.25698 |
| H                   | 3.68887  | -0.31963 | 0.69775  |
| H                   | -4.13051 | -0.21938 | -1.49713 |
| O                   | 2.07715  | 0.91301  | 0.50510  |
| O                   | -2.71883 | -1.70552 | -1.18941 |
| O                   | 3.39596  | 1.58706  | -1.81124 |
| O                   | -0.99288 | -0.20405 | -2.38275 |
| N                   | 4.65956  | -0.31925 | -1.70515 |
| N                   | -2.52773 | 1.37487  | -2.94324 |
| O                   | 1.03484  | 4.26086  | 1.75539  |
| O                   | -0.15684 | -2.97071 | -1.95701 |
| H                   | -0.13162 | -2.72947 | -2.89108 |
| O                   | 3.92548  | -2.77888 | -0.13677 |
| O                   | -3.34789 | -1.45058 | 1.83305  |
| N                   | 1.99524  | -3.32623 | 0.95202  |
| N                   | -4.82290 | 0.23160  | 1.43895  |
| O                   | 0.14322  | 0.89545  | 2.57277  |
| O                   | -1.12593 | -3.11546 | 0.72923  |
| H                   | -1.83258 | -2.80609 | 1.33275  |
| C                   | 0.89321  | 1.40172  | 3.66119  |
| H                   | 1.86894  | 0.90381  | 3.71712  |
| H                   | 0.34444  | 1.20768  | 4.59010  |
| H                   | 1.05031  | 2.47887  | 3.54356  |
| O                   | -0.23764 | 2.32763  | -0.00084 |
| C                   | 0.51675  | 3.38796  | -0.55111 |
| H                   | 1.51419  | 3.02651  | -0.83699 |
| C                   | 0.65291  | 4.55432  | 0.40750  |
| H                   | 0.01393  | 3.75279  | -1.46044 |
| C                   | -0.28039 | 4.79282  | 1.51544  |
| H                   | 1.17308  | 5.41279  | -0.02539 |
| H                   | -1.09149 | 4.08698  | 1.68284  |
| H                   | -0.44419 | 5.80655  | 1.88065  |
| H                   | -4.95330 | 1.18556  | 1.14056  |
| H                   | -5.42880 | -0.11948 | 2.16714  |
| H                   | -3.46289 | 1.73935  | -2.85847 |
| H                   | -1.87724 | 1.83488  | -3.56450 |
| H                   | 0.99779  | -3.18382 | 1.07799  |
| H                   | 2.40705  | -4.18879 | 1.27774  |
| H                   | 4.73877  | -1.24906 | -1.29670 |
| H                   | 5.13554  | -0.10057 | -2.56721 |

| Reactant - R3 |          |          |          |
|---------------|----------|----------|----------|
| Ti            | -0.10539 | 1.31133  | -0.11779 |
| Ti            | 0.33372  | -2.00448 | -0.15056 |
| H             | -2.79001 | -1.18813 | 0.47016  |
| H             | 2.81251  | 0.68927  | 1.11406  |
| C             | -2.43882 | -0.58131 | -0.37294 |
| C             | 2.57731  | -0.19833 | 0.50943  |
| C             | -3.05379 | -1.20469 | -1.63063 |
| C             | 3.57406  | -0.33742 | -0.66174 |
| O             | -1.02657 | -0.53473 | -0.35485 |
| O             | 1.27608  | -0.13375 | 0.00691  |
| C             | -2.95952 | 0.90660  | -0.23310 |
| C             | 2.57043  | -1.51548 | 1.35611  |
| C             | -4.02609 | 1.00671  | 0.88276  |
| C             | 1.56428  | -1.33106 | 2.50843  |
| H             | -3.43820 | 1.20533  | -1.17602 |
| H             | 3.57488  | -1.78195 | 1.71765  |
| O             | -1.87731 | 1.74260  | 0.01808  |
| O             | 2.02994  | -2.48970 | 0.53110  |
| O             | -3.84719 | 1.63775  | 1.91667  |
| O             | 0.37184  | -1.55466 | 2.26006  |
| N             | -5.16019 | 0.32316  | 0.58459  |
| N             | 2.00463  | -0.92987 | 3.71371  |
| O             | 0.73123  | 2.46143  | 1.11017  |
| O             | -0.82766 | -3.31384 | 0.30569  |
| H             | -1.02716 | -3.58184 | 1.21108  |
| O             | -4.28608 | -1.25099 | -1.71957 |
| O             | 3.24138  | -0.75428 | -1.76523 |
| N             | -2.22111 | -1.63157 | -2.59948 |
| N             | 4.86345  | -0.01972 | -0.35525 |
| O             | 0.17766  | 1.53182  | 2.10263  |
| O             | 0.64447  | -2.27577 | -1.91632 |
| H             | 1.50324  | -1.88807 | -2.17945 |
| C             | -0.77504 | 2.24549  | 2.91509  |
| H             | -0.26490 | 3.07696  | 3.40864  |
| H             | -1.10408 | 1.50523  | 3.64966  |
| H             | -1.63189 | 2.56916  | 2.32340  |
| O             | 0.39432  | 2.00599  | -1.67695 |
| C             | 1.30480  | 2.08548  | -2.74593 |
| H             | 1.84546  | 1.13169  | -2.83337 |
| C             | 2.29605  | 3.21038  | -2.61094 |
| H             | 0.73164  | 2.21970  | -3.67629 |
| C             | 2.37450  | 4.07056  | -1.59608 |
| H             | 2.98836  | 3.28800  | -3.45026 |
| H             | 1.69122  | 4.02364  | -0.75406 |
| H             | 3.12289  | 4.85735  | -1.58597 |
| H             | -5.18676 | -0.28459 | -0.23408 |
| H             | -5.87888 | 0.26694  | 1.29015  |
| H             | -1.21425 | -1.70227 | -2.47704 |
| H             | -2.64481 | -2.09540 | -3.39040 |
| H             | 5.08592  | 0.54036  | 0.45310  |
| H             | 5.53906  | -0.04849 | -1.10587 |
| H             | 2.98093  | -0.75907 | 3.89327  |



|                     |          |          |          |
|---------------------|----------|----------|----------|
| H                   | 1.33350  | -0.72631 | 4.44041  |
| <b>TS - R3</b>      |          |          |          |
| Ti                  | -0.10539 | 1.31133  | -0.11779 |
| Ti                  | 0.33372  | -2.00448 | -0.15056 |
| H                   | -2.79001 | -1.18813 | 0.47016  |
| H                   | 2.81251  | 0.68927  | 1.11406  |
| C                   | -2.43882 | -0.58131 | -0.37294 |
| C                   | 2.57731  | -0.19833 | 0.50943  |
| C                   | -3.05379 | -1.20469 | -1.63063 |
| C                   | 3.57406  | -0.33742 | -0.66174 |
| O                   | -1.02657 | -0.53473 | -0.35485 |
| O                   | 1.27608  | -0.13375 | 0.00691  |
| C                   | -2.95952 | 0.90660  | -0.23310 |
| C                   | 2.57043  | -1.51548 | 1.35611  |
| C                   | -4.02609 | 1.00671  | 0.88276  |
| C                   | 1.56428  | -1.33106 | 2.50843  |
| H                   | -3.43820 | 1.20533  | -1.17602 |
| H                   | 3.57488  | -1.78195 | 1.71765  |
| O                   | -1.87731 | 1.74260  | 0.01808  |
| O                   | 2.02994  | -2.48970 | 0.53110  |
| O                   | -3.84719 | 1.63775  | 1.91667  |
| O                   | 0.37184  | -1.55466 | 2.26006  |
| N                   | -5.16019 | 0.32316  | 0.58459  |
| N                   | 2.00463  | -0.92987 | 3.71371  |
| O                   | 0.73123  | 2.46143  | 1.11017  |
| O                   | -0.82766 | -3.31384 | 0.30569  |
| H                   | -1.02716 | -3.58184 | 1.21108  |
| O                   | -4.28608 | -1.25099 | -1.71957 |
| O                   | 3.24138  | -0.75428 | -1.76523 |
| N                   | -2.22111 | -1.63157 | -2.59948 |
| N                   | 4.86345  | -0.01972 | -0.35525 |
| O                   | 0.17766  | 1.53182  | 2.10263  |
| O                   | 0.64447  | -2.27577 | -1.91632 |
| H                   | 1.50324  | -1.88807 | -2.17945 |
| C                   | -0.77504 | 2.24549  | 2.91509  |
| H                   | -0.26490 | 3.07696  | 3.40864  |
| H                   | -1.10408 | 1.50523  | 3.64966  |
| H                   | -1.63189 | 2.56916  | 2.32340  |
| O                   | 0.39432  | 2.00599  | -1.67695 |
| C                   | 1.30480  | 2.08548  | -2.74593 |
| H                   | 1.84546  | 1.13169  | -2.83337 |
| C                   | 2.29605  | 3.21038  | -2.61094 |
| H                   | 0.73164  | 2.21970  | -3.67629 |
| C                   | 2.37450  | 4.07056  | -1.59608 |
| H                   | 2.98836  | 3.28800  | -3.45026 |
| H                   | 1.69122  | 4.02364  | -0.75406 |
| H                   | 3.12289  | 4.85735  | -1.58597 |
| H                   | -5.18676 | -0.28459 | -0.23408 |
| H                   | -5.87888 | 0.26694  | 1.29015  |
| H                   | -1.21425 | -1.70227 | -2.47704 |
| H                   | -2.64481 | -2.09540 | -3.39040 |
| H                   | 5.08592  | 0.54036  | 0.45310  |
| H                   | 5.53906  | -0.04849 | -1.10587 |
| H                   | 2.98093  | -0.75907 | 3.89327  |
| H                   | 1.33350  | -0.72631 | 4.44041  |
| <b>Product - R3</b> |          |          |          |
| Ti                  | -0.14828 | 1.15522  | -0.07374 |

|                      |          |          |          |
|----------------------|----------|----------|----------|
| Ti                   | 0.28440  | -2.14019 | -0.18220 |
| H                    | -2.77055 | -1.38104 | 0.43175  |
| H                    | 2.70483  | 0.58462  | 1.13453  |
| C                    | -2.46868 | -0.73569 | -0.40123 |
| C                    | 2.50301  | -0.33272 | 0.56291  |
| C                    | -3.11939 | -1.33102 | -1.65105 |
| C                    | 3.59750  | -0.56631 | -0.50095 |
| O                    | -1.05699 | -0.66402 | -0.44292 |
| O                    | 1.25872  | -0.26892 | -0.07117 |
| C                    | -3.00702 | 0.73221  | -0.17652 |
| C                    | 2.38535  | -1.59132 | 1.48564  |
| C                    | -3.96073 | 0.76348  | 1.03838  |
| C                    | 1.28008  | -1.30900 | 2.52043  |
| H                    | -3.57984 | 1.04410  | -1.06017 |
| H                    | 3.34405  | -1.85310 | 1.95721  |
| O                    | -1.92191 | 1.57942  | -0.00506 |
| O                    | 1.90124  | -2.60812 | 0.67412  |
| O                    | -3.68084 | 1.31577  | 2.09374  |
| O                    | 0.11105  | -1.52131 | 2.16723  |
| N                    | -5.12358 | 0.10223  | 0.79510  |
| N                    | 1.60441  | -0.83383 | 3.73488  |
| O                    | 2.43790  | 4.00831  | -0.52946 |
| O                    | -0.90385 | -3.44131 | 0.22954  |
| H                    | -1.14519 | -3.71695 | 1.12216  |
| O                    | -4.35293 | -1.36952 | -1.70586 |
| O                    | 3.34712  | -1.00000 | -1.61817 |
| N                    | -2.30705 | -1.75397 | -2.64017 |
| N                    | 4.86826  | -0.30477 | -0.07937 |
| O                    | 0.37261  | 1.86438  | 1.49485  |
| O                    | 0.68314  | -2.43985 | -1.92111 |
| H                    | 1.54968  | -2.05306 | -2.15843 |
| C                    | -0.28247 | 2.57328  | 2.53446  |
| H                    | -0.02032 | 3.63680  | 2.47642  |
| H                    | 0.05685  | 2.18857  | 3.50506  |
| H                    | -1.36864 | 2.44981  | 2.45662  |
| O                    | 0.41601  | 2.10505  | -1.49887 |
| C                    | 1.50953  | 2.47022  | -2.29331 |
| H                    | 2.29338  | 1.69958  | -2.24253 |
| C                    | 2.10006  | 3.81200  | -1.90585 |
| H                    | 1.18298  | 2.53225  | -3.34238 |
| C                    | 1.37313  | 4.79643  | -1.09620 |
| H                    | 2.85530  | 4.17311  | -2.60980 |
| H                    | 0.37761  | 4.54978  | -0.73516 |
| H                    | 1.59457  | 5.85737  | -1.20957 |
| H                    | -5.21901 | -0.45392 | -0.05293 |
| H                    | -5.76722 | -0.02624 | 1.56117  |
| H                    | -1.29938 | -1.81217 | -2.53433 |
| H                    | -2.73926 | -2.21269 | -3.42906 |
| H                    | 5.04276  | 0.27345  | 0.72811  |
| H                    | 5.60940  | -0.39460 | -0.75997 |
| H                    | 2.56088  | -0.66978 | 4.00506  |
| H                    | 0.86510  | -0.57271 | 4.37229  |
| <b>Reactant - R4</b> |          |          |          |
| Ti                   | -0.01424 | 1.24203  | 0.03810  |
| Ti                   | 0.44762  | -2.04657 | -0.36595 |
| H                    | -2.67090 | -1.32032 | 0.43383  |
| H                    | 2.96762  | 0.52463  | 1.06205  |

---

|                |          |          |          |
|----------------|----------|----------|----------|
| C              | -2.34408 | -0.63428 | -0.35679 |
| C              | 2.70291  | -0.29529 | 0.37921  |
| C              | -2.99091 | -1.13950 | -1.65132 |
| C              | 3.62376  | -0.29380 | -0.86088 |
| O              | -0.93422 | -0.57544 | -0.36982 |
| O              | 1.37172  | -0.19453 | -0.03379 |
| C              | -2.87156 | 0.82904  | -0.06654 |
| C              | 2.75026  | -1.69325 | 1.08202  |
| C              | -3.90665 | 0.82226  | 1.08276  |
| C              | 1.80775  | -1.63671 | 2.30117  |
| H              | -3.38153 | 1.20714  | -0.96312 |
| H              | 3.77442  | -1.98483 | 1.35897  |
| O              | -1.78577 | 1.65118  | 0.22601  |
| O              | 2.16967  | -2.58341 | 0.19243  |
| O              | -3.70817 | 1.37304  | 2.15790  |
| O              | 0.60548  | -1.85231 | 2.10113  |
| N              | -5.03837 | 0.14636  | 0.76024  |
| N              | 2.31456  | -1.34362 | 3.51235  |
| O              | 0.83111  | 2.27310  | 1.35927  |
| O              | -0.69143 | -3.40121 | 0.01207  |
| H              | -0.83291 | -3.75850 | 0.89748  |
| O              | -4.22533 | -1.19159 | -1.70691 |
| O              | 3.25013  | -0.68016 | -1.96029 |
| N              | -2.18472 | -1.45365 | -2.68310 |
| N              | 4.90443  | 0.11123  | -0.61948 |
| O              | 0.30124  | 1.25317  | 2.27411  |
| O              | 0.68356  | -2.13367 | -2.15867 |
| H              | 1.52795  | -1.70129 | -2.40633 |
| C              | -0.63184 | 1.88874  | 3.16820  |
| H              | -0.11271 | 2.67629  | 3.72092  |
| H              | -0.94136 | 1.08576  | 3.84304  |
| H              | -1.50320 | 2.26067  | 2.62809  |
| O              | 0.41506  | 2.15765  | -1.43240 |
| C              | -0.09223 | 3.12813  | -2.31799 |
| H              | -0.02036 | 2.72900  | -3.34111 |
| C              | 0.63691  | 4.44270  | -2.24184 |
| H              | -1.16177 | 3.28994  | -2.10919 |
| C              | 1.62335  | 4.73632  | -1.39664 |
| H              | 0.28611  | 5.18647  | -2.95792 |
| H              | 1.98047  | 4.01109  | -0.67255 |
| H              | 2.09465  | 5.71422  | -1.40039 |
| H              | -5.08144 | -0.38993 | -0.10658 |
| H              | -5.73766 | 0.02384  | 1.47681  |
| H              | -1.17344 | -1.52913 | -2.59725 |
| H              | -2.62863 | -1.84529 | -3.50166 |
| H              | 5.13387  | 0.65413  | 0.19856  |
| H              | 5.52228  | 0.18246  | -1.41588 |
| H              | 3.29853  | -1.17898 | 3.65137  |
| H              | 1.68501  | -1.21785 | 4.29189  |
| <b>TS - R4</b> |          |          |          |
| Ti             | -0.09396 | 1.22262  | -0.05889 |
| Ti             | 0.45736  | -2.03638 | -0.47961 |
| H              | -2.59228 | -1.52209 | 0.38181  |
| H              | 2.79536  | 0.61771  | 1.12219  |
| C              | -2.35789 | -0.74365 | -0.35427 |
| C              | 2.61988  | -0.21963 | 0.43202  |
| C              | -3.07315 | -1.15454 | -1.64352 |

---

|                     |          |          |          |
|---------------------|----------|----------|----------|
| C                   | 3.67815  | -0.22736 | -0.69228 |
| O                   | -0.95792 | -0.62659 | -0.47469 |
| O                   | 1.34856  | -0.14217 | -0.13832 |
| C                   | -2.91155 | 0.65421  | 0.13489  |
| C                   | 2.60826  | -1.60238 | 1.16472  |
| C                   | -3.81671 | 0.45738  | 1.37146  |
| C                   | 1.53592  | -1.53425 | 2.26874  |
| H                   | -3.52526 | 1.09139  | -0.66490 |
| H                   | 3.59849  | -1.87164 | 1.56238  |
| O                   | -1.84166 | 1.49578  | 0.41649  |
| O                   | 2.14631  | -2.51893 | 0.23241  |
| O                   | -3.51030 | 0.84139  | 2.49281  |
| O                   | 0.36762  | -1.77527 | 1.93482  |
| N                   | -4.97104 | -0.19359 | 1.06744  |
| N                   | 1.88646  | -1.20754 | 3.52511  |
| O                   | 1.03320  | 2.75395  | 0.42451  |
| O                   | -0.62547 | -3.46136 | -0.21165 |
| H                   | -0.79941 | -3.86916 | 0.64539  |
| O                   | -4.30773 | -1.22012 | -1.64209 |
| O                   | 3.39541  | -0.45087 | -1.86161 |
| N                   | -2.30629 | -1.40482 | -2.72150 |
| N                   | 4.95727  | -0.00288 | -0.27477 |
| O                   | 0.48941  | 1.69285  | 1.78397  |
| O                   | 0.79116  | -2.06108 | -2.25659 |
| H                   | 1.60228  | -1.56609 | -2.48457 |
| C                   | -0.31333 | 2.43673  | 2.69885  |
| H                   | 0.28179  | 2.64315  | 3.59571  |
| H                   | -1.21147 | 1.85556  | 2.93489  |
| H                   | -0.62618 | 3.38503  | 2.25259  |
| O                   | -0.14344 | 1.90210  | -1.77283 |
| C                   | -0.19981 | 3.27637  | -2.05181 |
| H                   | -0.13694 | 3.42904  | -3.14142 |
| C                   | 0.92902  | 4.00184  | -1.36042 |
| H                   | -1.16107 | 3.70047  | -1.72341 |
| C                   | 2.15380  | 3.43465  | -1.18665 |
| H                   | 0.74179  | 5.00651  | -0.98911 |
| H                   | 2.38943  | 2.47115  | -1.62498 |
| H                   | 2.95223  | 3.97433  | -0.69085 |
| H                   | -5.08368 | -0.61403 | 0.14554  |
| H                   | -5.57416 | -0.46808 | 1.82809  |
| H                   | -1.29273 | -1.39863 | -2.68189 |
| H                   | -2.76488 | -1.73053 | -3.55952 |
| H                   | 5.16598  | 0.34831  | 0.64619  |
| H                   | 5.68565  | 0.02066  | -0.97347 |
| H                   | 2.83882  | -0.99229 | 3.77240  |
| H                   | 1.15976  | -1.05990 | 4.21151  |
| <b>Product - R4</b> |          |          |          |
| Ti                  | -0.20165 | 1.12602  | 0.14156  |
| Ti                  | 0.42120  | -2.08459 | -0.44919 |
| H                   | -2.63803 | -1.63350 | 0.35741  |
| H                   | 2.75476  | 0.59778  | 1.09494  |
| C                   | -2.41888 | -0.84912 | -0.37640 |
| C                   | 2.56720  | -0.24858 | 0.41874  |
| C                   | -3.09082 | -1.29079 | -1.67819 |
| C                   | 3.59471  | -0.26663 | -0.73365 |
| O                   | -1.01866 | -0.67698 | -0.46523 |
| O                   | 1.27893  | -0.18845 | -0.12098 |

---

|   |          |          |          |
|---|----------|----------|----------|
| C | -3.03250 | 0.52639  | 0.09682  |
| C | 2.58516  | -1.62133 | 1.17071  |
| C | -3.94730 | 0.30555  | 1.32282  |
| C | 1.53827  | -1.54547 | 2.29886  |
| H | -3.64953 | 0.94258  | -0.71099 |
| H | 3.58711  | -1.87828 | 1.54516  |
| O | -1.99200 | 1.39987  | 0.38596  |
| O | 2.10540  | -2.55430 | 0.26276  |
| O | -3.66787 | 0.70767  | 2.44404  |
| O | 0.36001  | -1.77767 | 1.99358  |
| N | -5.07370 | -0.38636 | 1.00657  |
| N | 1.92205  | -1.21211 | 3.54359  |
| O | 2.12420  | 4.37056  | -0.41783 |
| O | -0.66951 | -3.49497 | -0.13658 |
| H | -0.83332 | -3.88696 | 0.72987  |
| O | -4.32235 | -1.38858 | -1.70044 |
| O | 3.30816  | -0.62930 | -1.86659 |
| N | -2.29760 | -1.52377 | -2.74267 |
| N | 4.86044  | 0.09470  | -0.37309 |
| O | 0.33276  | 1.71827  | 1.74995  |
| O | 0.74058  | -2.14637 | -2.22661 |
| H | 1.57437  | -1.68227 | -2.44619 |
| C | -0.31892 | 2.12791  | 2.94096  |
| H | 0.10989  | 1.58973  | 3.79633  |
| H | -1.39242 | 1.91470  | 2.87990  |
| H | -0.15796 | 3.20178  | 3.09394  |
| O | 0.20762  | 2.32624  | -1.14714 |
| C | -0.08707 | 3.67575  | -1.40303 |
| H | -0.60833 | 3.75819  | -2.36876 |
| C | 1.16280  | 4.53157  | -1.46333 |
| H | -0.76011 | 4.07907  | -0.63175 |
| C | 2.48726  | 3.97179  | -1.75337 |
| H | 0.96523  | 5.57151  | -1.73781 |
| H | 2.58016  | 2.89853  | -1.90470 |
| H | 3.24288  | 4.59353  | -2.23359 |
| H | -5.16339 | -0.80925 | 0.08389  |
| H | -5.68323 | -0.67124 | 1.75820  |
| H | -1.28465 | -1.54014 | -2.67807 |
| H | -2.73701 | -1.88702 | -3.57608 |
| H | 5.03407  | 0.61985  | 0.46999  |
| H | 5.55340  | 0.14416  | -1.10659 |
| H | 2.88796  | -1.04830 | 3.77811  |
| H | 1.21883  | -1.09852 | 4.26020  |

---
